# Supplementary material for: Identification of volatile organic compounds emitted by Sitka spruce and determination of their emission pathways and fluxes
Source: Copernicus journal article supplement (doi:10.5194/egusphere-2024-154), 2024-01-30
Supplement: Supplementary file [file egusphere-2024-154-AC2-supplement.pdf]

## Reply to Referees' Comments

### Reviewer 2

*The authors would like to thank the referee for their detailed review of the manuscript and the helpful comments that will help us to provide an improved version of the manuscript. We address all the comments below and we will further integrate the corresponding changes in a revised article.*

The manuscript quantifies the BVOC emission rates, potentials and blends of Sitka spruce, a species that may be a locally important BVOC source where it is used in plantation forestry. The manuscript highlights the potential of new gas analysers for producing a fuller understanding of total BVOC emissions by including traditionally harder-to-measure oxygenated compounds. With these data, the manuscript aims to produce an estimate for total BVOC emissions from Sitka spruce in Ireland. The question of quantifying BVOC emissions by a tree species that is used in plantation forestry is important, and using two analytical methods for detecting the BVOCs is a valuable contribution. Classifying the compounds by their emission pathway (pool emissions, de novo emissions or combination of both) is also interesting and in line with current research.

The major problem with the methods and interpretation of the results is the small number of study trees. Three to start with is not a lot, and throughout the manuscript, the three trees are reduced to only one. This is a normal problem in biological sciences, but the severe limitations in data should be considered carefully when analysing and using it to form conclusions. Here, the calculations on tree carbon balance and BVOC total emissions are only based on data from one seedling, which is not sufficient to be useful considering that it does not even allow calculating uncertainties in the estimates. Furthermore, the authors themselves also show that there is a large variation in BVOC emission rates between the three trees, so choosing only one of the trees to represent all the trees of the plantations seems weakly justified. Another related problem is the discussion around plant stress. A potential unrecognised stress was used to explain the differences between trees 1 and 2, and based on all the results shown it indeed seems that tree 2 was not performing at the same level as tree 1. Yet, these results are not sufficient to make claims on how stress affects BVOC emissions from Sitka because 1) the stress was unknown and not controlled and 2) again, there are only two trees that are compared to each other, and we cannot know which is "the normal". In other cases, stress can also increase BVOC emissions from pools.

The manuscript is for the most part very easy to follow and contains most of the pertinent information on methods and calculations (for a couple of further questions

on the statistical testing and model selection, see the specific comments below). In particular, the experimental setup was well described which I greatly appreciated. The manuscript results and discussion part is lengthy, especially relative to the small scope of the results. The manuscript could be balanced by condensing and focusing the results and discussion section on one or two questions that can be answered with the given data, and fully removing the parts on carbon balance and BVOC emissions upscaling.

*AR: The authors would like to thank the reviewer for their very useful comments. The aim of the study was to characterise Sitka spruce emissions (identify VOCs and quantify emission rates) and provide a comprehensive analysis of the respective contribution of de novo and pooled emissions. We are conscious that the number of trees would ideally be higher to take into account interindividual variability. Indeed, the intention of our study was to replicate all measurements on three healthy plants. Despite obtaining results from only one healthy tree, we believe the profile of emitted BVOCs and identification of emission pathways are robust as we conducted a comprehensive set of experiments where each cycle (temperature, light and daily cycles) was repeated for at least 7 consecutive days. We accept that using emissions from one healthy tree to provide estimates of emissions for scaling up purposes and carbon balance is quite uncertain. As a result, we will significantly reduce this part of the article in a revised manuscript.*

*Regarding the comments related to stress, we proposed that the difference in species emitted by Spruce 1 and Spruce 2 is best explained by Spruce 2 experiencing some unknown stress. This hypothesis is supported by fluorescence and CO<sub>2</sub> measurements. We are pleased that the reviewer agrees that the results do indicate stress in Spruce 2. At the same time, we agree that our results are not sufficient to make claims on how stress affects BVOC emissions from Sitka spruce and will review and re-word the text if necessary to avoid misinterpretation.*

### **Specific comments:**

Abstract:

The abstract is lacking a bit of the motivation for why the study was done, what the overarching objective or question was, or the context of the study

*AR: We will include this information in the abstract of the revised article.*

Introduction:

- I like that the introduction is not too long, but concise and to the point. It also introduces the important concepts for the further manuscript.

*AR: Thank you*

- Line 48: age and stress are not environmental conditions or parameters, rather a status or condition of the plant.

*AR: This will be changed to "environmental factors and plant conditions"*

- Lines 51-60: these could be combined into one paragraph? And the part on standardisation of the BVOC emission rates could be shortened to a simple phrase, e.g. "because of the strong dependence of BVOC emission fluxes on the temperature and PPFD, BVOC emission fluxes are often reported at standard conditions of 30 °C and 1000  $\mu\text{mol m}^{-2} \text{s}^{-1}$  to facilitate comparison between studies (Guenther et al. 1993)."

*AR: We will reduce this part in the revised manuscript.*

- Lines 39-47, 74: You could make it even more clear to the reader why it is important to know the emission pathway for each compound. I suspect your motivation here is that the emission pathway is important so that the emission fluxes can be better upscaled using T, or T and PAR?

*AR: Yes, absolutely. We will add this detail to the manuscript.*

Materials and methods:

- Line 79-84: So do I understand correctly, these trees were 4-yr old when they were used in the BVOC measurements? Did they have similar or different genetic backgrounds?

*AR: Yes, they were 4-year-old trees, with the same genetic background. This detail will be added to the revised manuscript.*

- Line 90: The PPFD of 250  $\mu\text{mol}^{-2} \text{s}^{-1}$  feels low. Was this a limitation of the chamber or chosen based on the mean conditions in Ireland?

*AR: This was the maximum PPFD generated in the chamber. However, it also corresponds to the mean light conditions in Ireland.*

- Line 110: "Viasala" -> "Vaisala"

*AR: Thanks. This will be corrected.*

- The growth chamber set-up is very clearly explained, thank you!

*AR: Thank you for the nice comment!*

- Line 121: You could consider moving the section 2.3 Experimental procedures here (after section 2.1), before giving the details on the gas analysers and auxiliary measurements. For me, it would make most sense to first read how the sampling of BVOCs was done, and then read on how they were analysed.

*AR: Following the referee's recommendation, we will move section 2.3 so that it follows on directly from section 2.1, and renumber the sections in Materials and Methods.*

- Line 136: Isoprene was not calibrated as isoprene?

*AR: Unfortunately we could not perform an isoprene calibration experiment. Instead, we extrapolated the average response factor from other hydrocarbons ( $\delta$ -3-carene and  $\beta$ -myrcene) to isoprene measurements.*

- Line 147: Were there any large peaks (potentially large emissions) that could not be determined, and could thus bias the results? Or were they mostly small peaks?

*AR: The unidentified peaks were mostly small peaks with negative mass defect, meaning they probably originated from low-level contamination as shown in previous studies (Karl et al., 2018; Salazar Gómez et al., 2021, 2019).*

- Line 162: Capital T for "the"

*AR: Thanks, this will be corrected.*

- Line 202: during the adaptation time, was the BVOC enclosure also already installed?

*AR: Yes, the BVOC enclosure was already installed during the acclimatisation period. This will be added to the manuscript.*

- Line 241: The equation is missing the "flow" (through the enclosure)

*AR: Thanks, this will be corrected.*

- Lines 246-249: Did you test this separately for each tree or all trees together? And you used all half-hourly points of tree enclosure and empty enclosure measurements? Was the t-test paired (one tree enclosure measurement corresponded to the empty enclosure measurement closest in time)?

*AR: As one of the original aims was to identify BVOCs emitted for the 3 spruce saplings and compare their emissions (see the individual variability), we tested each tree separately. Then, all half hourly measurements of each tree enclosure were compared to empty*

enclosure measurements. The measurements for one tree enclosure are supposed to be completely independent other tree enclosures, therefore the t-test was unpaired. Welch's t-test is suited for equal length samples where variance is not presumed to be equal, which was clearly the case here.

- Line 250: In figure S1 tree 3 does seem quite dead but still it is surprising that you did not get any significant BVOC signal. Do you have a guess why it did not show any significant signal? Did you measure chlorophyll fluorescence and CO<sub>2</sub> flux from that tree?

AR: Yes, it is surprising that Spruce 3 did not emit significant amount of BVOC because we know that even leaf litter from coniferous species has emissions (for example, see Viros et al., 2020). But we do not have an explanation for our observations, other than the concentrations were too small and were below the detection limit of the ToF CIMS. Note that we filtered and analysed only ion signals that are at least 3 times higher in the plant enclosure when compared to the empty enclosure. Some VOCs seemed to be emitted in very low amounts (as detected by ToF-CIMS and TD-GC-MS) but the emissions were not high enough to pass this filter.

CO<sub>2</sub> fluxes were measured but no uptake or emission was observed (see figure below). Chlorophyll fluorescence was only measured 3 days during the Daily cycle, and Fv/Fm values varied between 0.5 and 0.8.

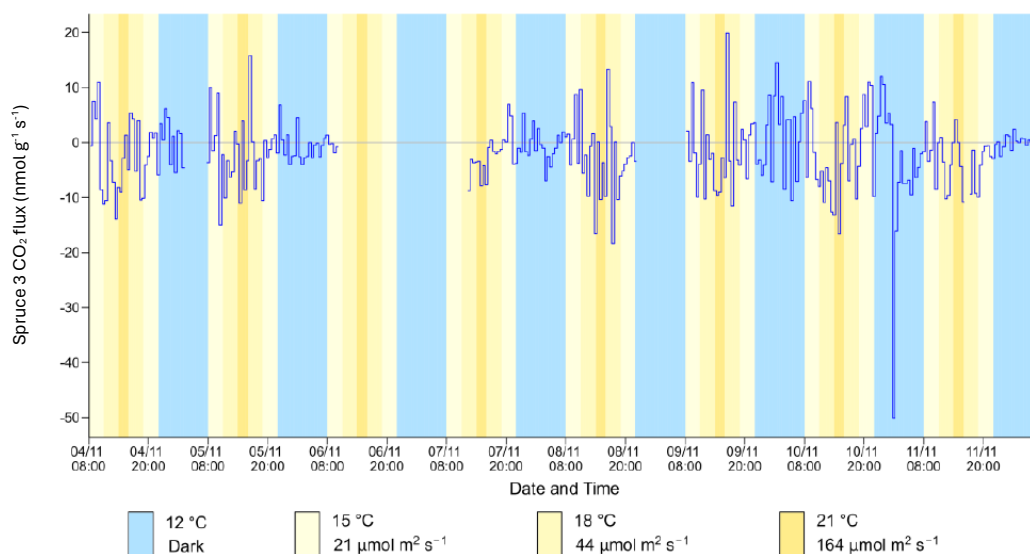

Figure 1: Time series of CO<sub>2</sub> flux for Spruce 3 during the Daily Cycle.

Line 258: For comparing with other emission values in literature, it would be good to also calculate emissions per needle mass or area (as most other studies tend to do). Adding the branch will make a big impact on the calculated emission rate as branch wood is likely much heavier than the needles.

AR: Emissions are often based on leaf masses because they are expected to only come from leaves. However, it is known for coniferous species which emit BVOCs from storage pools, that the stem and branches can emit significant amount of VOCs, e.g. see Staudt et al.

(2019). After all measurements were performed (especially temperature cycles), we found evidence for a strong contribution from the pooled pathway and interpreted this to indicate that the branches could contribute, at least in part, to the measured emissions. This is the reason why we decided to normalise BVOC emissions to the combined mass of the branches and needles. Biomass data are available in Table S1, showing that the difference in biomass is a factor of two. In other words, if our approach was not appropriate, we underestimate emissions by a factor of two.

However, for CO<sub>2</sub> exchange, we assumed that CO<sub>2</sub> assimilation was essentially supported through stomata – that is why CO<sub>2</sub> flux was normalised by needle mass only.

- Line 275: You could give also here the value you used as the maximum enzyme activity temperature

AR: We used the approach employed by Schuh et al. (1997) for cases where  $T_m$  is much higher than the measurement temperature, which is the case here as  $T_m$  is generally well above 300 K. In that case, due to the large temperature difference between  $T_m$  and the temperatures in this study, the exponential term (equation 5 in the manuscript) can be approximated to zero, and then the denominator can be approximated to one. This was explained in lines 614-620 in the manuscript, which we will move to methods section (see comments below).

- Line 290: This paragraph is not quite clear to me. By coefficients, do you mean the coefficients for  $E_{pooled}$  and  $E_{biosynthesis}$  as:  $E_{combined} = a * E_{pooled} + b * E_{biosynthesis}$ ? Or coefficients within the  $E_{pooled}$  and  $E_{biosynthesis}$  functions? Were the coefficient values you used in this study the exact same ones as Schuh et al 1997, or fitted for your data?

AR: By coefficients here we meant the empirical coefficients  $\alpha$ ,  $c_{L1}$ ,  $c_{T2}$ ,  $c_{T2}$  and  $\beta$ , which were specific to each spruce sapling.

Results:

- Line 302 or line 315: Somewhere around here, you could add a sentence on how well the two gas analysers captured the same compounds (shown in Table S2).

AR: This information will be incorporated into the revised manuscript.

- Line 308: For which species these examples are? It would be most fruitful to only compare to the same species, or at least the same genus.

AR: Among the examples cited, Purser et al. (2021) includes Sitka spruce, Janson et al. (1993) Norway spruce (*Picea abies*), but the Haapanala et al. (2009) publication is on mountain birch (*Betula pubescens*). We compared our data as much as we can to previous studies on Sitka spruce but the number of studies is limited (only 4 studies so far, Beverland et al.

1996, Street et al. 1996, Hayward et al. 2004, Puser et al 2021, all cited in the initial manuscript). We will revise the text accordingly in the revised version.

- Line 319: There could be a figure or table where the emission rates or contributions of the most common compounds per tree would be shown, also in the main text. Table or a pie chart or bar chart, for example.

AR: Thanks for this suggestion. We have created a new figure (see below) which will be added to the Supplementary Information.

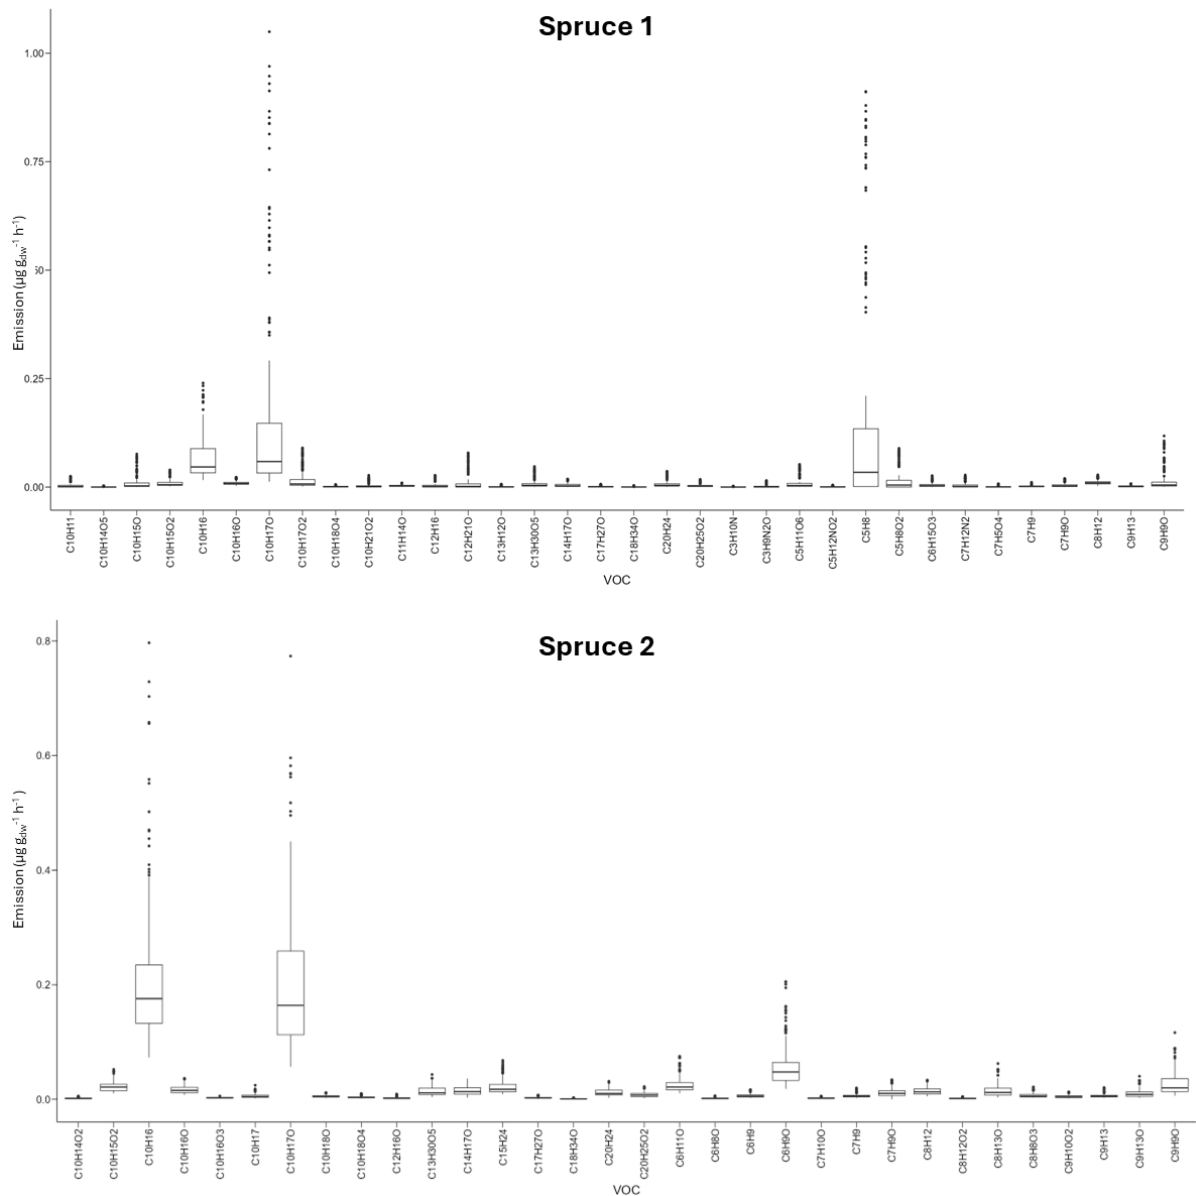

Box plot for Spruce 1 (top) and Spruce 2 (bottom) VOC emissions (in  $\mu\text{g g}_{dw}^{-1} \text{h}^{-1}$ ). The bar represents the median, the bottom and top limits of the box are the 25<sup>th</sup> and 75<sup>th</sup> quantiles, and the end of the bottom and top bars represent the 5<sup>th</sup> and 95<sup>th</sup> quantiles.

- Line 334: Was the resin running or solid? Was it within the enclosure? Exposed fresh resin can be a huge emission source of monoterpenes and dominate the BVOC emission measurements. If this is the case, the measured values should not necessarily be used for further calculations, because they are strongly biased by the exposed resin. Resin on stem surface is a normal occurrence but quite annoying when trying to measure BVOCs from shoots.

*AR: The resin was more like solid (i.e. not fresh). Although some of the resin spots were in the enclosure, they were small. We believe that they did not contribute a major fraction to emissions as light greatly affected most BVOC emissions, while emissions from resin deposits are only temperature dependent.*

- Lines 347-359: Here and elsewhere in the results/discussion, it would be helpful to the reader if you referred to the tables / figures in the manuscript when describing your results. Here for example, you could refer to Table S2?

*AR: The results and discussion section will be edited to include references to the Tables and Figures where appropriate.*

- Line 362: "six of the detected BVOC.." rather than six of the emissions

*AR: This will be corrected in the revised manuscript.*

- Section 3.2. The figures could be condensed in this section. Figures could cover shorter time spans, for example, 3-4 days - or overlay the days as in Figure 6. The texts also could be condensed a little: avoid describing too many details that are easy to see in the figures but concentrate on the most important general tendencies.

*AR: We think it is important to show that diurnal cycles of BVOC emissions are reproducible on a day-to-day basis, especially because we do not have many saplings. We prefer to leave the figures as they are. The text will be condensed in the revised manuscript.*

- Line 394: could you add a few other compounds in Figure 3 to show the different responses by different compounds

*AR: We will add the traces for another two dominant BVOCs- isoprene and monoterpenes to Figure 3 (see Figure below). Note that another compound is already presented in Figure 4.*



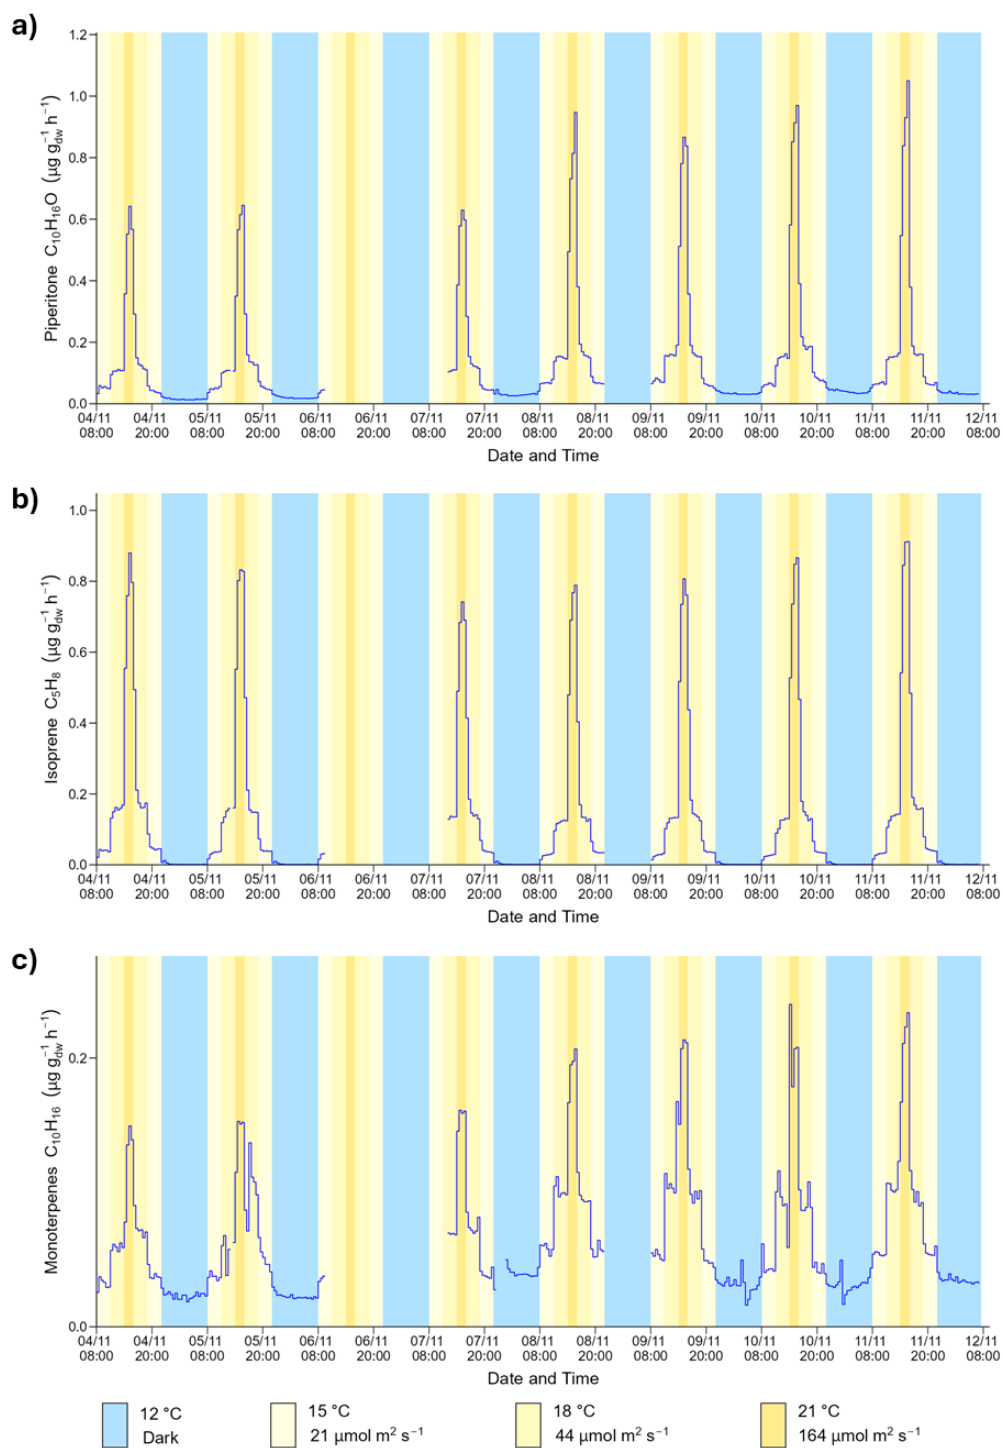

Time series of a) piperitone b) isoprene and c) monoterpene emission fluxes from Spruce 1 during the Daily Cycle. The colours represent nighttime and daytime, and the intensity of the yellow colour traduces the intensity of light and temperature.

- Line 402: Figure 4 y-axis says C11H14O

AR: This will be corrected in the revised manuscript.

- Line 449: refer to the figure 6

*AR: This will be corrected in the revised manuscript.*

- Line 455: this could be shown in a figure?

*AR: The time series of isoprene emissions during the Temperature cycle will be added in the revised version (see below). The figure clearly shows that when light was turned on and stable, the isoprene signal increased while temperature was maintained at 15 °C.*

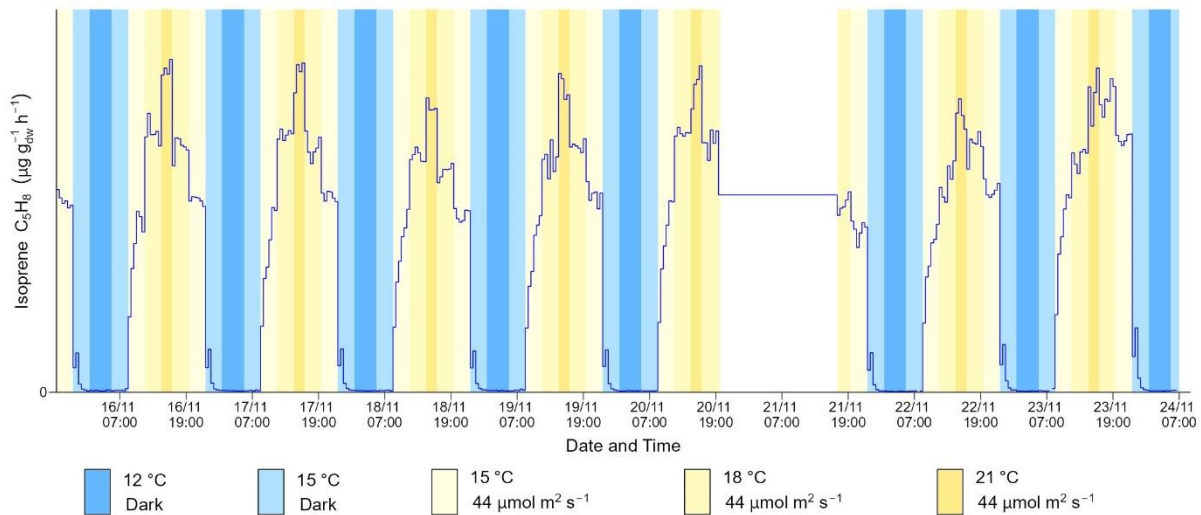

*Time series of the isoprene (C<sub>5</sub>H<sub>8</sub>) emission flux from Spruce 2 during the Temperature Cycle.*

- Line 463: You say that the emissions were more strongly influenced by temperature, but is it not rather that they were less influenced by light? I.e., the temperature impact may still be the same.

*AR: This is a good point. The idea was to state that for Spruce 1, PPFD was the main emission driver and for Spruce 2 temperature was the main emission driver. It is true that Spruce 2 BVOC emissions responded less to light, probably because of the mild stress it was suffering (supported by low CO<sub>2</sub> assimilation). Then, BVOC emissions were dominated by the pooled emission pathway, and this is why the temperature effect seemed more pronounced for Spruce 2. We will change this sentence in the text accordingly.*

- Line 474: Figure 7 shows that also temperature varied during the Light Cycle. Is this because increasing the light level also increased temperature although you intended the temperature to remain at 18 °C? With the increase in temperature during the light cycle it is hard to say how much the increases or decreases in emission rate are due to light level changes and how much due to the consequent temperature variations.

*AR: There is a mistake - the legend of Figure 7 was wrong. This will be corrected as shown in the figure below.*

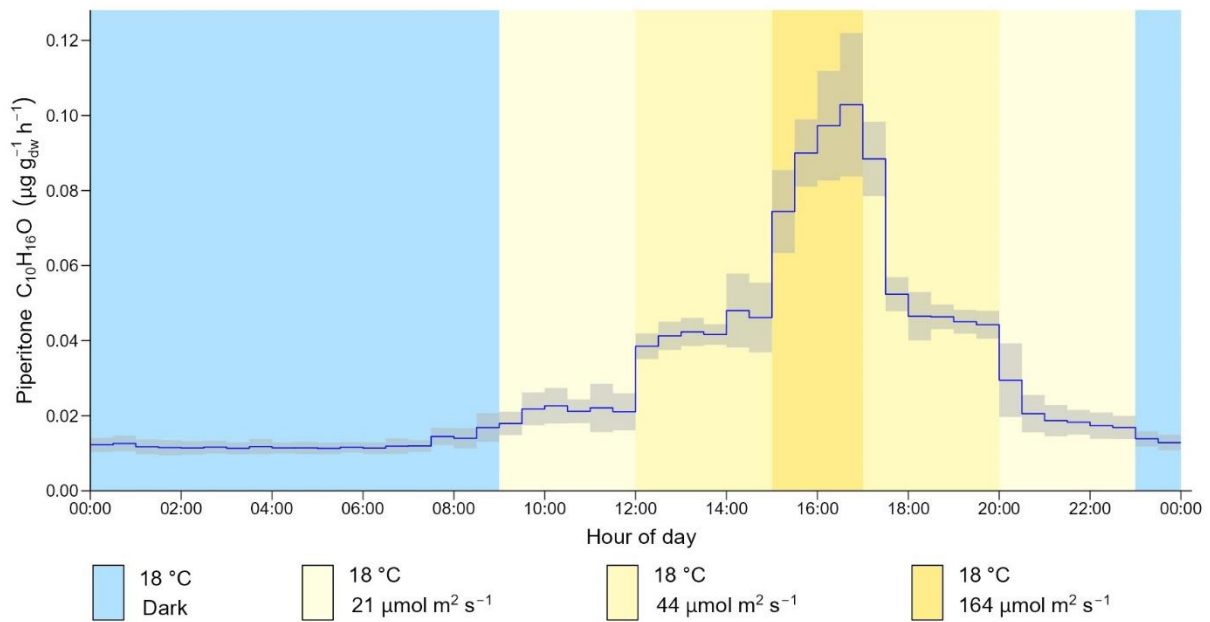

- Line 495: Change the reference format to match the rest of the manuscript

*AR: This will be corrected in the revised manuscript.*

- In order to streamline the manuscript, the CO<sub>2</sub> fluxes could be covered in a much shorter format. You could only show the difference in CO<sub>2</sub> flux rates between tree 1 and tree 2 to support your hypothesis on the lower level of functioning (stress) of tree 2 (lines 546-553). You could move this part to the beginning of the results section – it would be interesting for the reader to know before looking at the BVOC emission rates that the tree 2 is photosynthesising at a lower level than tree 1. With that, you could also mention that the chlorophyll fluorescence did not differ between the trees, which is surprising. No need to discuss or show the diurnal patterns of CO<sub>2</sub> flux, because they are as expected based on respiration and photosynthesis (positive flux in the dark, negative flux in the light).

*AR: This paper (i) focuses on the identification and quantification of key BVOC emissions from Sitka spruce using an unprecedented analytical effort for this species, and ii) provides a comprehensive understanding of BVOC emission pathways (de novo and pooled emissions). We therefore believe it makes sense to first address the question of BVOC emissions in the paper. Then, all other measurements are used to explain the variation in emissions and relate these observations to factors such as photosynthesis, stress, etc. Thus, the authors do not agree with the alternative approach outlined by the referee. However, we accept the point about discussing the CO<sub>2</sub> fluxes and diurnal cycles and will reduce the text on this part.*

- Line 521: plant growth produces CO<sub>2</sub> because of mitochondrial respiration used as energy source (contributes to positive CO<sub>2</sub> flux)

*AR: We think this statement is incorrect. If we define plant growth as an increase in dry mass, there has to be more uptake of CO<sub>2</sub> than release in mitochondrial respiration by growing plants which do not get their carbon from roots uptake.*

- Section 3.4.2 This is interesting in the sense that you were able to add many more BVOCs in calculating the carbon balance than normally is possible (with instrumentation that does not capture all compounds you could). However, these results are based on only one tree in lab conditions, measured over a short time period, so the usefulness of the results is very limited. The calculation also includes the bias that some of the BVOC emissions included here do come from pools, so the carbon released in their emissions is carbon that has been captured days or months beforehand.

*AR: Following comments from both referees on this part of the manuscript, we reduced the section on carbon balance to a single paragraph and moved Table 1 to Supplementary Information, as we believe that the values (BVOC emissions represent ca 0.2% of CO<sub>2</sub> assimilation flux), at least provide an order of magnitude estimation.*

- Sections 3.5.1: I think these tests for the emission pathway are quite interesting, but the discussion could be shortened. You could consider focusing on what were the proportions of total BVOC emissions that were pool emissions, de novo emissions, or both, and how this differed between your two trees. As you anyway don't show the emission data from the measurement cycles and models for all compounds, you do not need to discuss each of them in a lot of detail. One option could also be to add plots or tables for all compounds in the supporting materials (or actually tables S6 and S7 would already be enough) and guide the reader there in case they are interested in the emission pathway for a specific compound or compound group.

*AR: Thank you. Showing all the plots in the Supplementary Information will make it very hard to read. We propose to include all of them in a separate pdf file, which can be accessed using the online repository cited in the paper (10.5281/zenodo.10514476). In addition, we will shorten the discussion as proposed by the reviewer to simply discuss the fraction of biosynthetic and pooled emission pathways for the compounds.*

- Lines 578-582: This should be added to the methods. In addition, how did you determine which method best reproduced the emission profile? Visually based on the figure or with some goodness-of-fit metrics?

*AR: We will move the mentioned lines to section 2.4 4 Emission calculation and modelling. The chosen model was decided by doing a visual comparison of emission time series for the Daily cycle. We always favoured the simplest solution (single modelled, either pooled or de novo) when it reproduced the measurements. But when it obviously did not match, the combined emission model was used. For example, it is clear that all BVOCs with night time emissions cannot be reproduced by a de novo emission model, and BVOCs experiencing an increase during the Light cycle cannot be reproduced by the pooled emissions model.*

- Line 615-620: This should be in the methods

*AR: We will move these lines to methods.*

- Line 629: Did you calculate a correlation or is this based on the visual assessment of the figure?

*AR: As explained above, this is based on the visual assessment of time series.*

- Line 635: for comparisons, you could pull out other studies on conifers (with monoterpene pools in needles), for example see Ghirardo et al. 2010 (<https://doi.org/10.1111/j.1365-3040.2009.02104.x>)

*AR: This particular reference will be used in the text and cited.*

Section 3.5.2: I understand the wish to try and upscale the BVOC emissions to see potential total emissions from the Sitka spruce plantations. However, with the emission data that is only based on one seedling, you cannot even really get an estimate for the uncertainty in the calculation. I would propose adding the comparisons from Table 2 at the end of the previous section and removing the emission upscaling part of the manuscript.

*AR: As explained above, we agree that the section on the upscaling and C balance should be reduced significantly. However, we believe that is useful to report the order of magnitude for the emissions. We will therefore considerably reduce this section to include a simple discussion only.*

Figures:

- Figure 1 is really nice, clear and helpful for understanding the measurement system!

*AR: Thank you.*

- Figure 2: is this showing results from Tof-CIMS and TD-GS-MS or one of them? Clarify that in the legend. In this figure, the downward columns make me

think of negative emissions (deposition), although of course that is not what the figure wants to show. Consider dividing the figure into two subfigures, one per tree, that are stacked one on top of the other and that have the y-axis going from 0 to 17 from bottom up. So, flipping tree 2 around. This would help to avoid misreading the figure, which otherwise is nice and a good idea on how to show the emission spectra.

*AR: The results in Figure 2 are from both TD-GC-MS and ToF-CIMS. The reviewer is correct in that the negative part of the figure can be interpreted as deposited BVOCs, we will therefore follow the suggestion and split the figure. The Figure caption will also be edited accordingly.*

- Figures 3-5, 9: these don't need to show the whole time series, and I'd recommend also doing the same as you did in Figures 6 and 7 – overlay all days in one figure

*AR: One of the strengths of our study is that we follow emissions over 7 consecutive days. As a result, we believe it is important to present this data as full time series to show the day-to-day variation and reproducibility as appropriate.*

- Tables S6 and S7: it would be interesting if these two tables were combined, it would allow better comparison between the compounds

*AR: These Tables will be combined in a revised version.*

## References

- Byrne, K.A., Kiely, G., Leahy, P., 2005. CO<sub>2</sub> fluxes in adjacent new and permanent temperate grasslands. *Agric. For. Meteorol.* 135, 82–92. <https://doi.org/10.1016/j.agrformet.2005.10.005>
- Ghirardo, A., Koch, K., Taipale, R., Zimmer, I., Schnitzler, J.-P., Rinne, J., 2010. Determination of de novo and pool emissions of terpenes from four common boreal/alpine trees by <sup>13</sup>C<sub>2</sub> labelling and PTR-MS analysis. *Plant Cell Environ.* 33, 781–792. <https://doi.org/10.1111/j.1365-3040.2009.02104.x>
- Hayward, S., Tani, A., Owen, S.M., Hewitt, C.N., 2004. Online analysis of volatile organic compound emissions from Sitka spruce (*Picea sitchensis*). *Tree Physiol.* 24, 721–728. <https://doi.org/10.1093/treephys/24.7.721>
- Karl, T., Striednig, M., Graus, M., Hammerle, A., Wohlfahrt, G., 2018. Urban flux measurements reveal a large pool of oxygenated volatile organic compound emissions. *Proc. Natl. Acad. Sci.* 201714715. <https://doi.org/10.1073/pnas.1714715115>
- Lavi, A., Vermeuel, M.P., Novak, G.A., Bertram, T.H., 2018. The sensitivity of benzene cluster cation chemical ionization mass spectrometry to select biogenic terpenes. *Atmospheric Meas. Tech.* 11, 3251–3262. <https://doi.org/10.5194/amt-11-3251-2018>

- Portillo-Estrada, M., Zenone, T., Arriga, N., Ceulemans, R., 2018. Contribution of volatile organic compound fluxes to the ecosystem carbon budget of a poplar short-rotation plantation. *GCB Bioenergy* 10, 405–414. <https://doi.org/10.1111/gcbb.12506>
- Salazar Gómez, J.I., Klucken, C., Sojka, M., Masliuk, L., Lunkenbein, T., Schlögl, R., Ruland, H., 2019. Elucidation of artefacts in proton transfer reaction time-of-flight mass spectrometers. *J. Mass Spectrom.* 54, 987–1002. <https://doi.org/10.1002/jms.4479>
- Salazar Gómez, J.I., Sojka, M., Klucken, C., Schlögl, R., Ruland, H., 2021. Determination of trace compounds and artifacts in nitrogen background measurements by proton transfer reaction time-of-flight mass spectrometry under dry and humid conditions. *J. Mass Spectrom.* 56. <https://doi.org/10.1002/jms.4777>
- Schuh, G., Heiden, A.C., Hoffmann, Th., Kahl, J., Rockel, P., Rudolph, J., Wildt, J., 1997. Emissions of Volatile Organic Compounds from Sunflower and Beech: Dependence on Temperature and Light Intensity. *J. Atmospheric Chem.* 27, 291–318. <https://doi.org/10.1023/A:1005850710257>
- Staudt, M., Byron, J., Piquemal, K., Williams, J., 2019. Compartment specific chiral pinene emissions identified in a Maritime pine forest. *Sci. Total Environ.* 654, 1158–1166. <https://doi.org/10.1016/j.scitotenv.2018.11.146>
- Viros, J., Hernandez, C., Wortham, H., Gavinet, J., Lecareux, C., Ormeño, E., 2020. Litter of mediterranean species as a source of volatile organic compounds. *Atmos. Environ.* 242, 117815. <https://doi.org/10.1016/j.atmosenv.2020.117815>
